# Supplementary material for: Mass Spectrometry Reveals Differences in Stability and Subunit Interactions between Activated and Nonactivated Conformers of the (αβγδ)4 Phosphorylase Kinase Complex
Source: PubMed Central journal article supplement — Mol Cell Proteomics. 2012 Sep 10;11(12):1768–76. doi: 10.1074/mcp.M112.021394 (PMC3518106; doi:10.1074/mcp.m112.021394), 2012-09-10
Supplement: supp_M112.021394_mcp.M112.021394-1.pdf [file supp_M112.021394_mcp.M112.021394-1.pdf]

Suppl. Figure 1

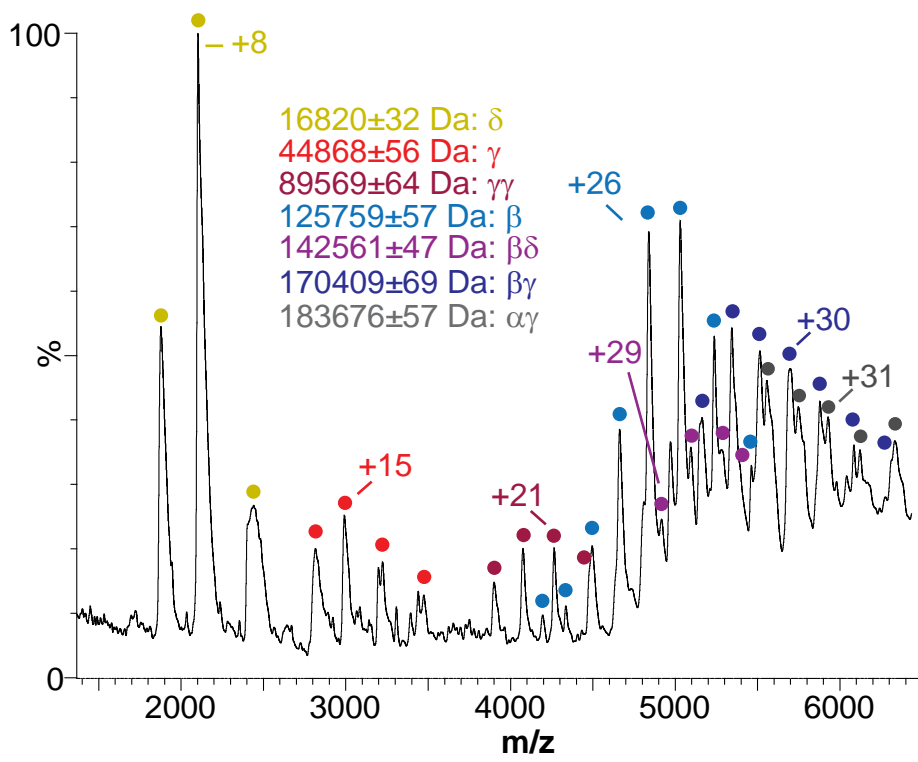

Suppl. Figure 2

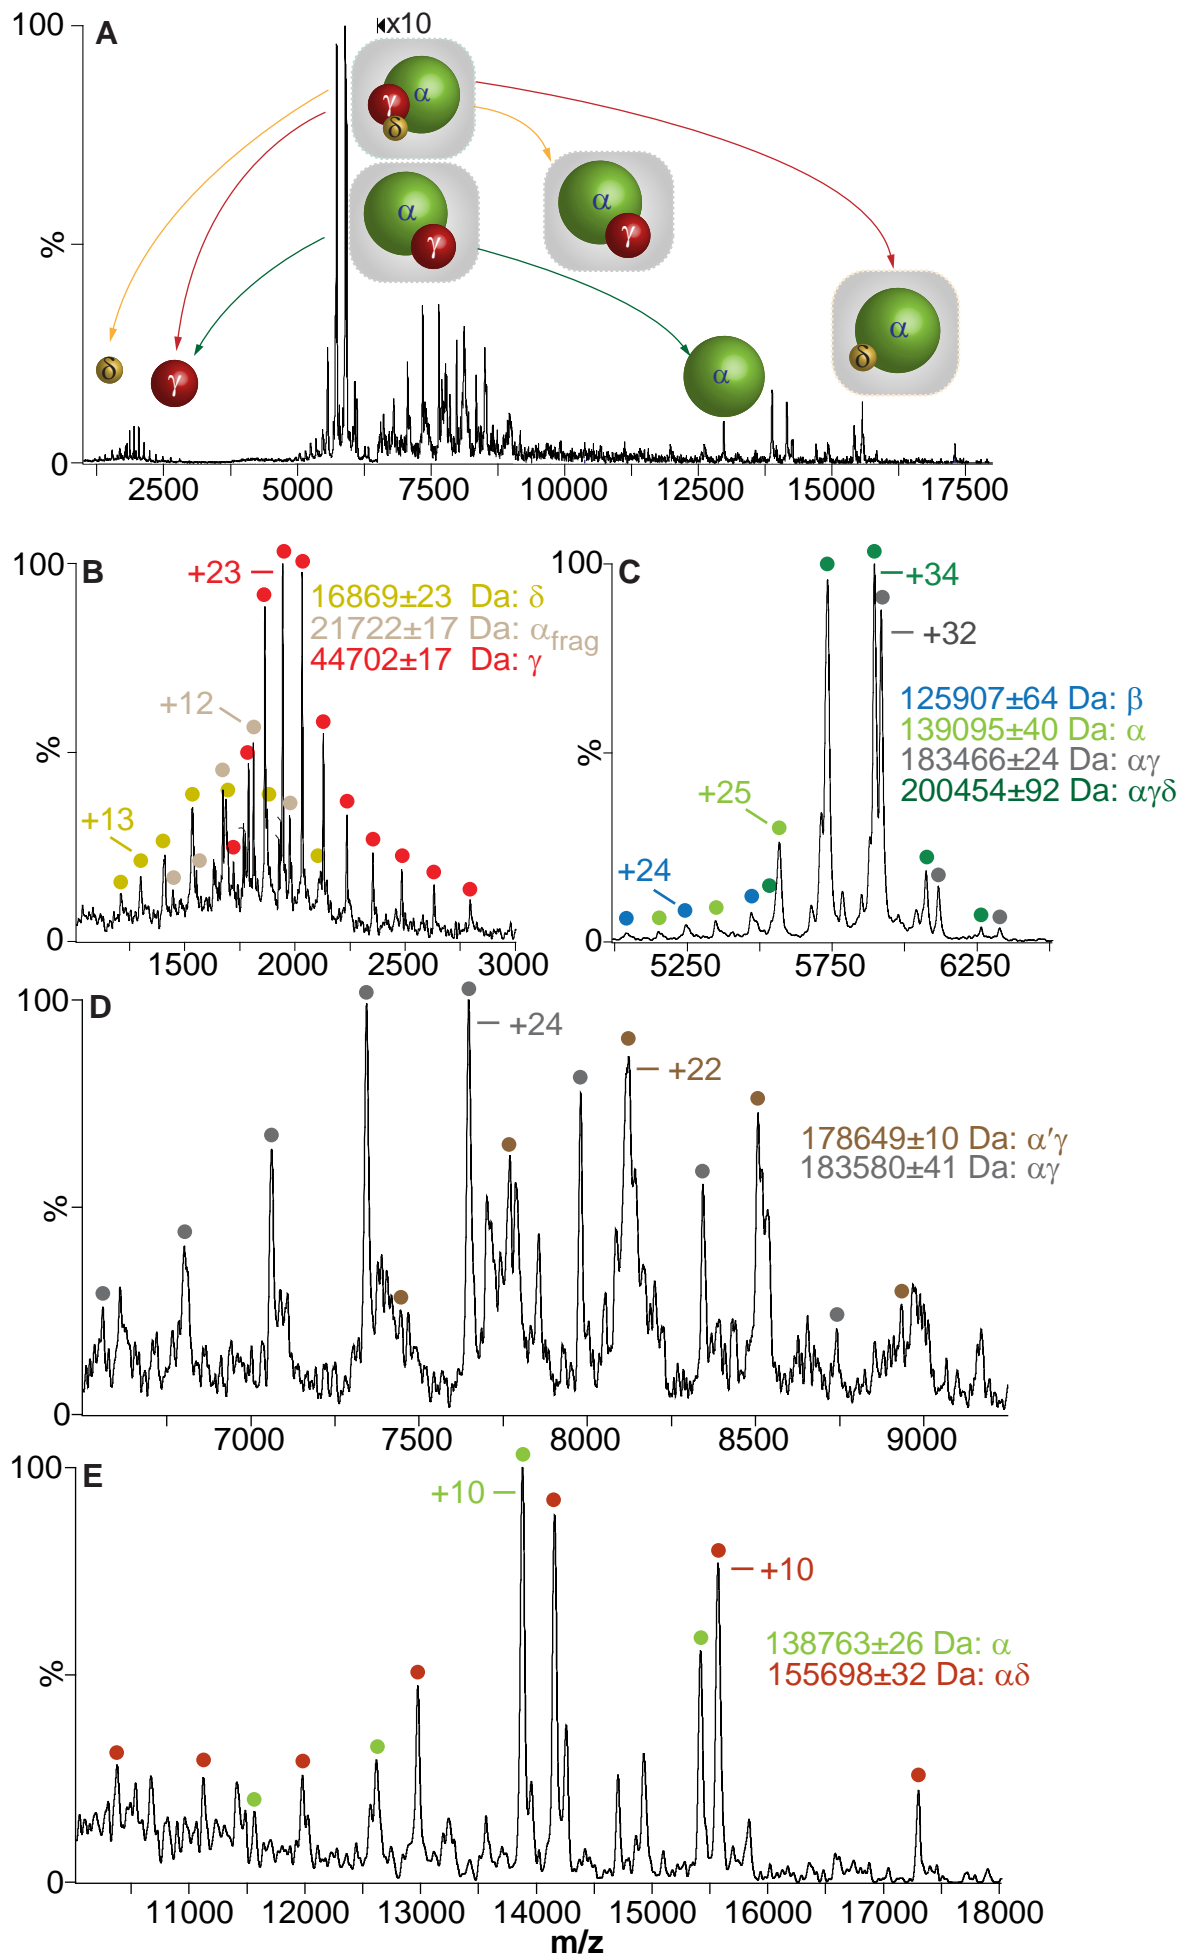

Suppl. Figure 3

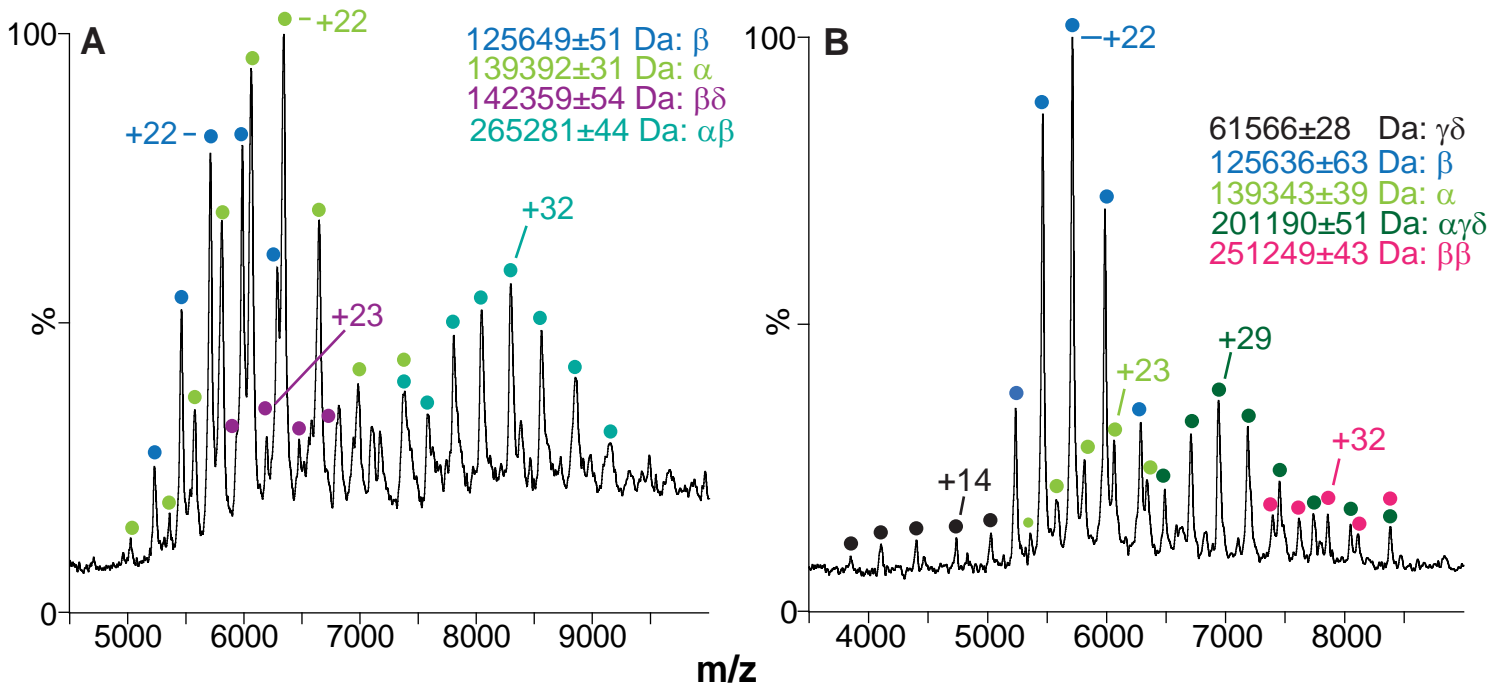

## Supplemental Figure Legends

Supplemental Fig. 1. **Nanoelectrospray mass spectrum of non-activated PhK obtained in 20% v/v acetic acid.** Incubation of PhK for 1 hr in 20% (v/v) acetic acid revealed single subunits and several dimeric subcomplexes.

Supplemental Fig. 2. **Tandem mass spectra of  $\alpha\gamma\delta$ ,  $\alpha'\gamma\delta$  and  $\gamma\delta$  subcomplexes from non-activated PhK obtained in 10% ammonium hydroxide at 5,916  $m/z$ .** **A**, Full spectrum and subcomplex dissociation products. **B**, Low  $m/z$  products, which include the  $\gamma$  and  $\delta$  subunits and a 21 kDa species corresponding to a well characterized proteolytic fragment of the  $\alpha$  subunit ( $\alpha_{\text{frag}}$ ) (9). **C**, The  $m/z$  region surrounding the isolated parent peaks corresponding to the  $\alpha\gamma\delta$  and  $\gamma\delta$  subcomplexes. **D**, Stripped  $\alpha\gamma$  and  $\alpha'\gamma$  dimers resulting from ejection of the  $\delta$  subunit from  $\alpha\gamma\delta$  and  $\alpha'\gamma\delta$  subcomplexes. **E**, Region of the spectrum showing species derived from activation and dissociation of the  $\alpha\gamma\delta$  trimer.

Supplemental Fig. 3. **Nano-electrospray mass spectra of phospho-activated PhK in the presence of denaturants.** Spectra of PhK after addition of **(A)** 10% (v/v) acetic acid or **(B)** 10% (v/v) ammonium hydroxide.
